# Supplementary material for: Jellyfish gel and its hybrid hydrogels with high mechanical strength
Source: Royal Society of Chemistry journal article supplement (doi:10.1039/c0sm00632g), 2010-10-09
Supplement: c0sm00632g.pdf [file c0sm00632g.pdf]

## Supporting Information

### **Jellyfish Gel and Its Hybrid Hydrogels with High Mechanical Strength**

By *Xuezhen Wang, Huiliang Wang\** and *Hugh R. Brown*

[\*] Prof. H. L. Wang, X. Z. Wang  
College of Chemistry, Beijing Normal University,  
Beijing 100875, China  
E-mail: [wanghl@bnu.edu.cn](mailto:wanghl@bnu.edu.cn)

Prof. Hugh R. Brown  
ARC Centre of Excellence for Electromaterials Science,  
Engineering Faculty, University of Wollongong,  
NSW 2522, Australia

**Table S1.** The synthesis conditions and the mechanical properties of the hydrogels.

| Hydrogel        | Synthesis |           |                          | Water [wt.-%] | Compression test                   | Tensile test        |
|-----------------|-----------|-----------|--------------------------|---------------|------------------------------------|---------------------|
|                 | $t$ (h)   | $C_M$ (M) | $C_C$ (%) <sup>[a]</sup> |               | $\varepsilon_c$ [%] <sup>[b]</sup> | $\varepsilon_t$ [%] |
| JF gel          |           |           |                          | 99.0          | 79.7                               | 160                 |
| PAA gel (A1)    | 2         | 2         | 0                        | 86.2          | 80.0                               | 970                 |
| PAA gel (A2)    | 2         | 3         | 0                        | 79.3          | 90.3                               | 1200                |
| PAA gel (A3)    | 2         | 4         | 0                        | 72.5          | 81.2                               | 830                 |
| PAA gel (B1)    | 2         | 2         | 0.05                     | 86.9          | 77.5                               | 320                 |
| PAA gel (B2)    | 2         | 2         | 0.10                     | 86.4          | 83.8                               | 340                 |
| PAA gel (B3)    | 2         | 2         | 0.20                     | 85.5          | 88.5                               | 365                 |
| PAA gel (B4)    | 2         | 2         | 0.30                     | 85.0          | 92.3                               | 280                 |
| JF-AA gel (A1)  | 2         | 2         | 0                        | 85.8          | 95.0                               | 370                 |
| JF-AA gel (A2)  | 2         | 3         | 0                        | 78.3          | 95.0                               | 310                 |
| JF-AA gel (A3)  | 2         | 4         | 0                        | 71.5          | 95.0                               | 300                 |
| JF-AA gel (B1)  | 2         | 2         | 0.05                     | 84.9          | 95.0                               | 310                 |
| JF-AA gel (B2)  | 2         | 2         | 0.10                     | 84.6          | 95.0                               | 210                 |
| JF-AA gel (B3)  | 2         | 2         | 0.20                     | 84.4          | 92.9                               | 250                 |
| JF-AA gel (B4)  | 2         | 2         | 0.30                     | 82.7          | 90.0                               | 200                 |
| PAAm gel (A1)   | 2         | 2         | 0                        | 88.3          | 95.0                               | 1640 <sup>[c]</sup> |
| PAAm gel (A2)   | 2         | 3         | 0                        | 85.7          | 95.0                               | 1700 <sup>[c]</sup> |
| PAAm gel (A3)   | 2         | 4         | 0                        | 78.3          | 95.0                               | 1480 <sup>[c]</sup> |
| PAAm gel (B1)   | 2         | 2         | 0.05                     | 87.6          | 92.8                               | 99                  |
| PAAm gel (B2)   | 2         | 2         | 0.10                     | 87.5          | 88.8                               | 61                  |
| PAAm gel (B3)   | 2         | 2         | 0.20                     | 87.0          | 78.8                               | 45                  |
| PAAm gel (B4)   | 2         | 2         | 0.30                     | 86.8          | 70.3                               | 37                  |
| JF-AAm gel (A1) | 2         | 2         | 0                        | 85.5          | 95.0                               | 75                  |
| JF-AAm gel (A2) | 2         | 3         | 0                        | 84.5          | 95.0                               | 170                 |
| JF-AAm gel (A3) | 2         | 4         | 0                        | 77.0          | 95.0                               | 145                 |
| JF-AAm gel (B1) | 2         | 2         | 0.05                     | 84.5          | 95.0                               | 150                 |
| JF-AAm gel (B2) | 2         | 2         | 0.10                     | 87.0          | 75.5                               | 55                  |
| JF-AAm gel (B3) | 2         | 2         | 0.20                     | 85.2          | 73.3                               | 80                  |
| JF-AAm gel (B4) | 2         | 2         | 0.30                     | 86.7          | 72.6                               | 160                 |

[a]: crosslinker concentration ( $C_C$ )/ monomer concentration ( $C_M$ ), mol/mol.

[b]: The strain 95.0% is not the fracture strain, and the corresponding stresses are the stresses at 95% strain.

[c]: The gels did not break but slipped from the clamping apparatus.

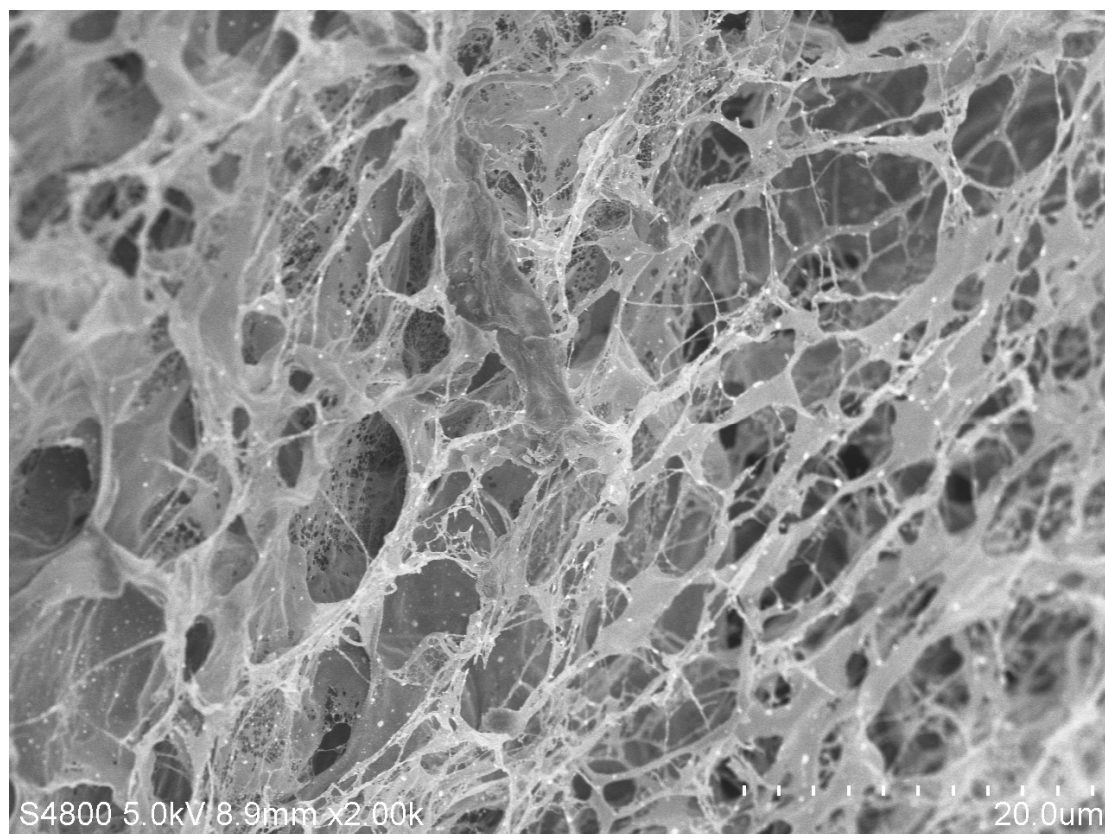

**Figure S1.** SEM micrograms of the jellyfish mesogloea after being immersed in 2 M AA solution for 18 h.

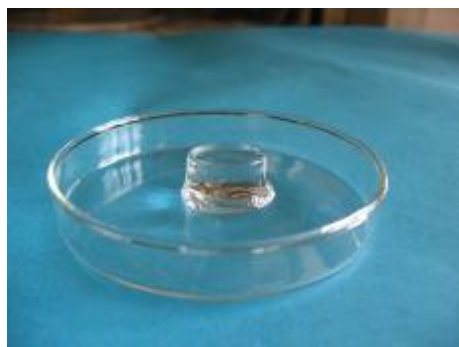

PAA gel

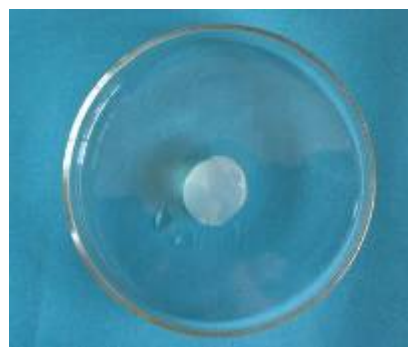

Jellyfish gel

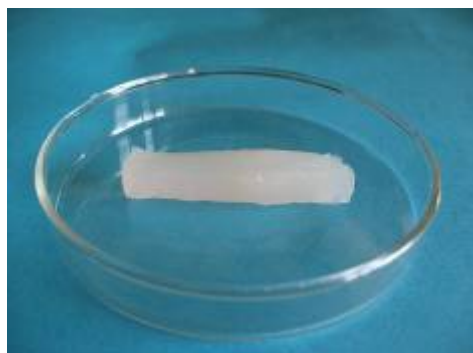

JF-AA gel

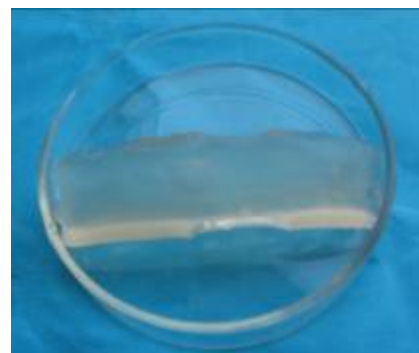

JF-AAm gel

**Figure S2.** Photos of AA gel, jellyfish gel, JF-AA gel and JF-AAm gel.

## Supplementary Movies

**Movie S1.** The torsion of the JF-AA gel (B4) by hand. It could be twisted for several turns and it totally recovered its original shape immediately after the release of torsional forces.

**Movie S2.** The torsion of the AA gel (B4) by hand. It broke after only about 180° torsion.

**Movie S3.** The torsion of a jellyfish gel by hand. It broke after only about 180° torsion. Water leaked from jellyfish gel under torsional stress.
